# Supplementary material
Source: publisher figshare collection journal article supplement (https://gsajournals.figshare.com/ndownloader/files/20183171)
Supplement: Supplementary file 1 [file 20183171]

**Figure S6**

**SPI-1 and SPI-2 of *S.* Rissen.** The SPI-1 (A) and SPI-2 (B) homologs of strain GJ0703 are both collinearly compared with the counterpart of genomes of Typhimurium LT2, Typhi CT18 and Typhimurium 14028S. The genes of mosaic SPI-1 and SPI-2 homologs identified in a variety of *Salmonella* genomes were color matching, and the similar gene organization of *Salmonella* pathogenicity islands carrying type III secretion system (T3SS) were characterized.
